# Supplementary material for: Genetic Analysis Implicates Dysregulation of SHANK2 in Renal Cell Carcinoma Progression
Source: MDPI journal article supplement (doi:10.3390/ijerph191912471), 2022-09-30
Supplement: s1 [file s1]

**Table S1.** Genotyped SNPs and the *P* values of their associations with RCC risk and overall survival

| Gene          | SNP ID      | Chromosome | Position | MAF   | HWE   | Allele | Risk     |          | Overall survival |          |
|---------------|-------------|------------|----------|-------|-------|--------|----------|----------|------------------|----------|
|               |             |            |          |       |       |        | <i>P</i> | <i>q</i> | <i>P</i>         | <i>q</i> |
| <i>SHANK1</i> | rs35816100  | 19         | 50649692 | 0.079 | 0.056 | T>C    | 0.312    | 0.892    | 0.136            | 0.532    |
| <i>SHANK1</i> | rs35429431  | 19         | 50650175 | 0.196 | 0.387 | T>C    | 0.136    | 0.695    | 0.074            | 0.466    |
| <i>SHANK1</i> | rs117873682 | 19         | 50650766 | 0.089 | 1.000 | C>A    | 0.610    | 0.897    | 0.474            | 0.578    |
| <i>SHANK1</i> | rs11879379  | 19         | 50652265 | 0.111 | 0.164 | C>T    | 0.522    | 0.897    | 0.237            | 0.532    |
| <i>SHANK1</i> | rs889132    | 19         | 50655132 | 0.470 | 0.099 | G>C    | 0.694    | 0.897    | 0.382            | 0.544    |
| <i>SHANK1</i> | rs10404821  | 19         | 50657831 | 0.253 | 0.472 | C>A    | 0.798    | 0.897    | 0.970            | 0.701    |
| <i>SHANK1</i> | rs59500446  | 19         | 50661203 | 0.046 | 1.000 | C>T    | 0.843    | 0.897    | 0.604            | 0.592    |
| <i>SHANK1</i> | rs73596615  | 19         | 50662968 | 0.325 | 0.723 | G>A    | 0.746    | 0.897    | 0.380            | 0.544    |
| <i>SHANK1</i> | rs3893128   | 19         | 50672798 | 0.161 | 0.312 | G>A    | 0.061    | 0.682    | 0.994            | 0.701    |
| <i>SHANK1</i> | rs4802729   | 19         | 50675712 | 0.373 | 0.934 | T>C    | 0.203    | 0.888    | 0.781            | 0.641    |
| <i>SHANK1</i> | rs4802731   | 19         | 50678332 | 0.130 | 0.863 | G>A    | 0.032    | 0.533    | 0.983            | 0.701    |
| <i>SHANK1</i> | rs12460584  | 19         | 50682824 | 0.241 | 0.915 | C>T    | 0.927    | 0.932    | 0.407            | 0.557    |
| <i>SHANK1</i> | rs59312377  | 19         | 50683350 | 0.110 | 0.843 | A>G    | 0.501    | 0.897    | 0.875            | 0.684    |
| <i>SHANK1</i> | rs10406993  | 19         | 50689889 | 0.346 | 0.197 | G>A    | 0.831    | 0.897    | 0.294            | 0.532    |
| <i>SHANK1</i> | rs8103945   | 19         | 50690186 | 0.144 | 0.875 | T>C    | 0.662    | 0.897    | 0.314            | 0.544    |
| <i>SHANK1</i> | rs35259530  | 19         | 50691291 | 0.154 | 0.180 | A>G    | 0.113    | 0.695    | 0.484            | 0.578    |
| <i>SHANK1</i> | rs12459070  | 19         | 50692634 | 0.090 | 1.000 | C>T    | 0.994    | 0.934    | 0.554            | 0.587    |
| <i>SHANK1</i> | rs4802734   | 19         | 50696314 | 0.466 | 0.211 | T>C    | 0.664    | 0.897    | 0.063            | 0.466    |
| <i>SHANK1</i> | rs12461427  | 19         | 50702059 | 0.114 | 0.847 | A>G    | 0.338    | 0.892    | 0.353            | 0.544    |
| <i>SHANK1</i> | rs77136946  | 19         | 50704289 | 0.037 | 0.222 | C>T    | 0.282    | 0.888    | 0.001            | 0.114    |
| <i>SHANK1</i> | rs41275786  | 19         | 50704518 | 0.079 | 0.788 | C>T    | 0.371    | 0.897    | 0.254            | 0.532    |
| <i>SHANK1</i> | rs4801849   | 19         | 50707194 | 0.430 | 0.067 | A>G    | 0.921    | 0.932    | 0.017            | 0.292    |
| <i>SHANK1</i> | rs78855510  | 19         | 50707278 | 0.079 | 0.789 | C>T    | 0.411    | 0.897    | 0.430            | 0.561    |

|               |             |    |          |       |       |     |       |       |       |       |
|---------------|-------------|----|----------|-------|-------|-----|-------|-------|-------|-------|
| <i>SHANK1</i> | rs7246004   | 19 | 50713652 | 0.385 | 0.071 | T>G | 0.949 | 0.932 | 0.018 | 0.292 |
| <i>SHANK1</i> | rs3745530   | 19 | 50714293 | 0.213 | 0.562 | G>A | 0.820 | 0.897 | 0.460 | 0.569 |
| <i>SHANK1</i> | rs3826780   | 19 | 50717630 | 0.046 | 1.000 | G>A | 0.824 | 0.897 | 0.385 | 0.544 |
| <i>SHANK1</i> | rs3810282   | 19 | 50717739 | 0.039 | 1.000 | C>A | 0.433 | 0.897 | 0.165 | 0.532 |
| <i>SHANK1</i> | rs11084024  | 19 | 50725377 | 0.045 | 0.382 | G>A | 0.669 | 0.897 | 0.660 | 0.616 |
| <i>SHANK2</i> | rs145975209 | 11 | 70483722 | 0.034 | 0.543 | C>A | 0.599 | 0.897 | 0.194 | 0.532 |
| <i>SHANK2</i> | rs573795    | 11 | 70496312 | 0.332 | 0.861 | G>A | 0.065 | 0.682 | 0.269 | 0.532 |
| <i>SHANK2</i> | rs11236504  | 11 | 70518554 | 0.182 | 0.794 | C>T | 0.040 | 0.605 | 0.050 | 0.466 |
| <i>SHANK2</i> | rs12419914  | 11 | 70530319 | 0.395 | 0.371 | C>T | 0.265 | 0.888 | 0.557 | 0.587 |
| <i>SHANK2</i> | rs11236569  | 11 | 70532867 | 0.348 | 0.607 | G>A | 0.810 | 0.897 | 0.151 | 0.532 |
| <i>SHANK2</i> | rs76213548  | 11 | 70539179 | 0.055 | 0.042 | G>A | 0.525 | 0.897 | 0.922 | 0.686 |
| <i>SHANK2</i> | rs73522161  | 11 | 70544357 | 0.228 | 0.739 | G>A | 0.777 | 0.897 | 0.008 | 0.292 |
| <i>SHANK2</i> | rs11236600  | 11 | 70547213 | 0.369 | 0.358 | A>G | 0.749 | 0.897 | 0.689 | 0.616 |
| <i>SHANK2</i> | rs138959027 | 11 | 70549823 | 0.034 | 0.539 | T>G | 0.572 | 0.897 | 0.750 | 0.622 |
| <i>SHANK2</i> | rs80042712  | 11 | 70559047 | 0.090 | 0.471 | C>T | 0.570 | 0.897 | 0.018 | 0.292 |
| <i>SHANK2</i> | rs12285102  | 11 | 70570756 | 0.216 | 0.818 | T>C | 0.870 | 0.906 | 0.007 | 0.292 |
| <i>SHANK2</i> | rs77550108  | 11 | 70571334 | 0.092 | 1.000 | T>C | 0.991 | 0.934 | 0.011 | 0.292 |
| <i>SHANK2</i> | rs11604385  | 11 | 70574867 | 0.034 | 1.000 | C>T | 0.713 | 0.897 | 0.930 | 0.686 |
| <i>SHANK2</i> | rs948196    | 11 | 70578152 | 0.133 | 0.310 | G>A | 0.741 | 0.897 | 0.712 | 0.617 |
| <i>SHANK2</i> | rs10899208  | 11 | 70578306 | 0.454 | 0.480 | C>T | 0.557 | 0.897 | 0.131 | 0.532 |
| <i>SHANK2</i> | rs80178232  | 11 | 70583528 | 0.048 | 1.000 | C>T | 0.849 | 0.897 | 0.048 | 0.466 |
| <i>SHANK2</i> | rs7127885   | 11 | 70585358 | 0.105 | 0.216 | G>A | 0.360 | 0.892 | 0.090 | 0.487 |
| <i>SHANK2</i> | rs6592642   | 11 | 70592847 | 0.189 | 0.446 | G>A | 0.462 | 0.897 | 0.256 | 0.532 |
| <i>SHANK2</i> | rs10793170  | 11 | 70593921 | 0.425 | 0.381 | G>A | 0.788 | 0.897 | 0.082 | 0.466 |
| <i>SHANK2</i> | rs77778540  | 11 | 70595750 | 0.101 | 1.000 | A>C | 0.407 | 0.897 | 0.329 | 0.544 |
| <i>SHANK2</i> | rs4980621   | 11 | 70597406 | 0.112 | 1.000 | C>T | 0.834 | 0.897 | 0.700 | 0.616 |

|        |             |    |          |       |       |     |       |       |       |       |
|--------|-------------|----|----------|-------|-------|-----|-------|-------|-------|-------|
| SHANK2 | rs948193    | 11 | 70598341 | 0.364 | 0.737 | G>A | 0.800 | 0.897 | 0.068 | 0.466 |
| SHANK2 | rs146305493 | 11 | 70600507 | 0.047 | 1.000 | G>A | 0.940 | 0.932 | 0.153 | 0.532 |
| SHANK2 | rs4980625   | 11 | 70605947 | 0.353 | 1.000 | G>T | 0.143 | 0.695 | 0.942 | 0.690 |
| SHANK2 | rs9665887   | 11 | 70610446 | 0.054 | 0.249 | T>C | 0.854 | 0.897 | 0.705 | 0.616 |
| SHANK2 | rs61195439  | 11 | 70614305 | 0.256 | 0.541 | T>C | 0.558 | 0.897 | 0.525 | 0.587 |
| SHANK2 | rs72946910  | 11 | 70622083 | 0.304 | 0.712 | G>A | 0.719 | 0.897 | 0.235 | 0.532 |
| SHANK2 | rs79654220  | 11 | 70625394 | 0.076 | 0.787 | T>C | 0.329 | 0.892 | 0.350 | 0.544 |
| SHANK2 | rs558830    | 11 | 70629412 | 0.325 | 0.859 | T>C | 0.852 | 0.897 | 0.358 | 0.544 |
| SHANK2 | rs77483217  | 11 | 70640604 | 0.033 | 1.000 | C>T | 0.224 | 0.888 | 0.461 | 0.569 |
| SHANK2 | rs12277496  | 11 | 70644848 | 0.268 | 0.113 | A>C | 0.299 | 0.892 | 0.221 | 0.532 |
| SHANK2 | rs563532    | 11 | 70646303 | 0.449 | 1.000 | C>G | 0.268 | 0.888 | 0.614 | 0.592 |
| SHANK2 | rs471859    | 11 | 70647992 | 0.212 | 0.815 | T>C | 0.078 | 0.682 | 0.523 | 0.587 |
| SHANK2 | rs117035625 | 11 | 70657245 | 0.039 | 1.000 | A>G | 0.610 | 0.897 | 0.275 | 0.532 |
| SHANK2 | rs525304    | 11 | 70660101 | 0.289 | 0.777 | G>T | 0.255 | 0.888 | 0.633 | 0.604 |
| SHANK2 | rs61233494  | 11 | 70668305 | 0.110 | 0.843 | A>G | 0.451 | 0.897 | 0.747 | 0.622 |
| SHANK2 | rs10899375  | 11 | 70683045 | 0.280 | 0.211 | T>C | 0.079 | 0.682 | 0.422 | 0.561 |
| SHANK2 | rs17161065  | 11 | 70688406 | 0.084 | 0.305 | T>C | 0.170 | 0.776 | 0.192 | 0.532 |
| SHANK2 | rs79812988  | 11 | 70700098 | 0.061 | 0.161 | A>G | 0.014 | 0.389 | 0.608 | 0.592 |
| SHANK2 | rs12421506  | 11 | 70710009 | 0.265 | 0.366 | C>T | 0.119 | 0.695 | 0.287 | 0.532 |
| SHANK2 | rs118165285 | 11 | 70721599 | 0.031 | 0.127 | T>G | 0.711 | 0.897 | 0.898 | 0.684 |
| SHANK2 | rs74236607  | 11 | 70731218 | 0.082 | 0.793 | C>T | 0.761 | 0.897 | 0.164 | 0.532 |
| SHANK2 | rs118132458 | 11 | 70740364 | 0.068 | 0.760 | C>A | 0.553 | 0.897 | 0.867 | 0.684 |
| SHANK2 | rs550832    | 11 | 70745633 | 0.309 | 0.855 | G>A | 0.452 | 0.897 | 0.514 | 0.587 |
| SHANK2 | rs149405382 | 11 | 70786000 | 0.045 | 0.035 | G>A | 0.740 | 0.897 | 0.589 | 0.592 |
| SHANK2 | rs75332771  | 11 | 70801971 | 0.047 | 0.167 | A>C | 0.636 | 0.897 | 0.695 | 0.616 |
| SHANK2 | rs1992674   | 11 | 70802301 | 0.225 | 0.265 | T>C | 0.361 | 0.892 | 0.581 | 0.592 |

|        |             |    |          |       |       |     |       |       |       |       |
|--------|-------------|----|----------|-------|-------|-----|-------|-------|-------|-------|
| SHANK2 | rs76079118  | 11 | 70809822 | 0.037 | 0.054 | G>T | 0.836 | 0.897 | 0.274 | 0.532 |
| SHANK2 | rs3017493   | 11 | 70819416 | 0.060 | 1.000 | A>G | 0.278 | 0.888 | 0.279 | 0.532 |
| SHANK2 | rs11237599  | 11 | 70820660 | 0.088 | 0.085 | C>T | 0.996 | 0.934 | 0.540 | 0.587 |
| SHANK2 | rs12295625  | 11 | 70825755 | 0.043 | 1.000 | G>A | 0.738 | 0.897 | 0.538 | 0.587 |
| SHANK2 | rs144847184 | 11 | 70830864 | 0.032 | 0.490 | A>G | 0.307 | 0.892 | 0.374 | 0.544 |
| SHANK2 | rs2921340   | 11 | 70838719 | 0.414 | 1.000 | C>T | 0.281 | 0.888 | 0.558 | 0.587 |
| SHANK2 | rs3017479   | 11 | 70855025 | 0.122 | 0.465 | T>C | 0.539 | 0.897 | 0.928 | 0.686 |
| SHANK2 | rs10899616  | 11 | 70879130 | 0.310 | 0.203 | G>A | 0.718 | 0.897 | 0.026 | 0.369 |
| SHANK2 | rs530497    | 11 | 70889612 | 0.109 | 1.000 | G>A | 0.314 | 0.892 | 0.250 | 0.532 |
| SHANK2 | rs34944804  | 11 | 70901936 | 0.141 | 0.872 | A>C | 0.981 | 0.934 | 0.731 | 0.622 |
| SHANK2 | rs3020095   | 11 | 70903916 | 0.143 | 0.340 | C>T | 0.639 | 0.897 | 0.355 | 0.544 |
| SHANK2 | rs79477765  | 11 | 70907773 | 0.119 | 0.713 | C>T | 0.279 | 0.888 | 0.203 | 0.532 |
| SHANK2 | rs7113981   | 11 | 70925728 | 0.271 | 0.767 | G>A | 0.661 | 0.897 | 0.835 | 0.672 |
| SHANK2 | rs76274790  | 11 | 70925838 | 0.036 | 1.000 | C>G | 0.080 | 0.682 | 0.219 | 0.532 |
| SHANK2 | rs4074929   | 11 | 70927426 | 0.243 | 0.833 | C>T | 0.357 | 0.892 | 0.271 | 0.532 |
| SHANK2 | rs78885129  | 11 | 70954765 | 0.106 | 0.413 | G>T | 0.471 | 0.897 | 0.214 | 0.532 |
| SHANK2 | rs4262749   | 11 | 71100226 | 0.274 | 1.000 | C>A | 0.741 | 0.897 | 0.615 | 0.592 |
| SHANK2 | rs117467179 | 11 | 71100415 | 0.052 | 0.413 | A>G | 0.129 | 0.695 | 0.080 | 0.466 |
| SHANK2 | rs73521173  | 11 | 71118855 | 0.032 | 0.027 | C>T | 0.954 | 0.932 | 0.064 | 0.466 |
| SHANK2 | rs137945425 | 11 | 71123086 | 0.038 | 0.618 | C>G | 0.020 | 0.423 | 0.403 | 0.557 |
| SHANK2 | rs117253486 | 11 | 71129376 | 0.090 | 1.000 | A>C | 0.556 | 0.897 | 0.888 | 0.684 |
| SHANK2 | rs11232163  | 11 | 71129751 | 0.352 | 0.608 | C>T | 0.137 | 0.695 | 0.152 | 0.532 |
| SHANK2 | rs10792488  | 11 | 71137802 | 0.486 | 0.311 | G>A | 0.118 | 0.695 | 0.168 | 0.532 |
| SHANK2 | rs9888203   | 11 | 71149721 | 0.144 | 0.431 | G>T | 0.855 | 0.897 | 0.785 | 0.641 |
| SHANK2 | rs7941128   | 11 | 71177012 | 0.480 | 0.755 | A>C | 0.238 | 0.888 | 0.892 | 0.684 |
| SHANK2 | rs11232477  | 11 | 71192792 | 0.118 | 0.710 | A>G | 0.475 | 0.897 | 0.876 | 0.684 |

|               |             |    |          |       |       |     |       |       |       |       |
|---------------|-------------|----|----------|-------|-------|-----|-------|-------|-------|-------|
| <i>SHANK2</i> | rs58984468  | 11 | 71194944 | 0.107 | 1.000 | T>C | 0.542 | 0.897 | 0.993 | 0.701 |
| <i>SHANK2</i> | rs11232512  | 11 | 71200067 | 0.062 | 0.091 | C>T | 0.270 | 0.888 | 0.591 | 0.592 |
| <i>SHANK2</i> | rs74748300  | 11 | 71200444 | 0.132 | 1.000 | G>A | 0.637 | 0.897 | 0.439 | 0.566 |
| <i>SHANK2</i> | rs55712817  | 11 | 71201995 | 0.109 | 0.843 | T>C | 0.382 | 0.897 | 0.993 | 0.701 |
| <i>SHANK2</i> | rs147523086 | 11 | 71202212 | 0.042 | 0.621 | G>A | 0.013 | 0.389 | 0.565 | 0.589 |
| <i>SHANK2</i> | rs59417145  | 11 | 71207990 | 0.144 | 1.000 | G>A | 0.965 | 0.934 | 0.295 | 0.532 |
| <i>SHANK2</i> | rs11232573  | 11 | 71208647 | 0.343 | 0.434 | G>A | 0.013 | 0.389 | 0.170 | 0.532 |
| <i>SHANK2</i> | rs11232576  | 11 | 71209545 | 0.146 | 1.000 | A>G | 0.796 | 0.897 | 0.272 | 0.532 |
| <i>SHANK2</i> | rs11232591  | 11 | 71213183 | 0.145 | 1.000 | G>A | 0.901 | 0.932 | 0.272 | 0.532 |
| <i>SHANK2</i> | rs7929059   | 11 | 71214813 | 0.361 | 0.737 | A>G | 0.382 | 0.897 | 0.428 | 0.561 |
| <i>SHANK2</i> | rs1470162   | 11 | 71215246 | 0.315 | 0.788 | G>A | 0.103 | 0.695 | 0.927 | 0.686 |
| <i>SHANK2</i> | rs10792551  | 11 | 71216017 | 0.402 | 0.936 | A>C | 0.798 | 0.897 | 0.692 | 0.616 |
| <i>SHANK2</i> | rs141482340 | 11 | 71220704 | 0.030 | 1.000 | T>A | 0.821 | 0.897 | 0.373 | 0.544 |
| <i>SHANK2</i> | rs147674252 | 11 | 71223556 | 0.051 | 0.684 | T>C | 0.774 | 0.897 | 0.700 | 0.616 |
| <i>SHANK2</i> | rs74937165  | 11 | 71225150 | 0.056 | 1.000 | A>G | 0.122 | 0.695 | 0.574 | 0.592 |
| <i>SHANK2</i> | rs10792565  | 11 | 71227678 | 0.174 | 0.685 | G>T | 0.000 | 0.030 | 0.742 | 0.622 |
| <i>SHANK2</i> | rs10897855  | 11 | 71245451 | 0.494 | 0.534 | T>G | 0.574 | 0.897 | 0.370 | 0.544 |
| <i>SHANK2</i> | rs143643492 | 11 | 71248057 | 0.052 | 1.000 | C>A | 0.706 | 0.897 | 0.106 | 0.532 |
| <i>SHANK2</i> | rs1372108   | 11 | 71254030 | 0.036 | 0.208 | G>A | 0.083 | 0.682 | 0.461 | 0.569 |
| <i>SHANK2</i> | rs7130526   | 11 | 71255627 | 0.443 | 0.097 | G>A | 0.928 | 0.932 | 0.140 | 0.532 |
| <i>SHANK2</i> | rs10751061  | 11 | 71256388 | 0.486 | 0.877 | G>C | 0.450 | 0.897 | 0.384 | 0.544 |
| <i>SHANK2</i> | rs2119509   | 11 | 71258636 | 0.160 | 0.563 | A>G | 0.130 | 0.695 | 0.822 | 0.667 |
| <i>SHANK3</i> | rs6010044   | 22 | 50663510 | 0.398 | 0.167 | A>C | 0.062 | 0.682 | 0.723 | 0.622 |
| <i>SHANK3</i> | rs9616906   | 22 | 50666252 | 0.059 | 0.720 | G>A | 0.525 | 0.897 | 0.069 | 0.466 |
| <i>SHANK3</i> | rs9616907   | 22 | 50668551 | 0.060 | 0.723 | G>C | 0.444 | 0.897 | 0.068 | 0.466 |
| <i>SHANK3</i> | rs75265108  | 22 | 50671289 | 0.045 | 0.634 | G>A | 0.830 | 0.897 | 0.071 | 0.466 |

|               |             |    |          |       |       |     |       |       |       |       |
|---------------|-------------|----|----------|-------|-------|-----|-------|-------|-------|-------|
| <i>SHANK3</i> | rs75347843  | 22 | 50673933 | 0.404 | 0.684 | G>A | 0.015 | 0.389 | 0.736 | 0.622 |
| <i>SHANK3</i> | rs76982449  | 22 | 50676230 | 0.101 | 0.667 | G>A | 0.337 | 0.892 | 0.057 | 0.466 |
| <i>SHANK3</i> | rs12484572  | 22 | 50677435 | 0.400 | 0.516 | G>A | 0.011 | 0.389 | 0.971 | 0.701 |
| <i>SHANK3</i> | rs9616915   | 22 | 50679152 | 0.067 | 1.000 | T>C | 0.359 | 0.892 | 0.336 | 0.544 |
| <i>SHANK3</i> | rs7286601   | 22 | 50682988 | 0.061 | 1.000 | T>G | 0.278 | 0.888 | 0.187 | 0.532 |
| <i>SHANK3</i> | rs9616934   | 22 | 50684165 | 0.173 | 0.585 | C>A | 0.229 | 0.888 | 0.515 | 0.587 |
| <i>SHANK3</i> | rs139076185 | 22 | 50684673 | 0.062 | 1.000 | G>A | 0.537 | 0.897 | 0.915 | 0.686 |
| <i>SHANK3</i> | rs8138473   | 22 | 50696460 | 0.305 | 0.199 | C>T | 0.509 | 0.897 | 0.444 | 0.566 |
| <i>SHANK3</i> | rs9968024   | 22 | 50706303 | 0.374 | 0.319 | T>C | 0.156 | 0.735 | 0.683 | 0.616 |
| <i>SHANK3</i> | rs147487861 | 22 | 50709307 | 0.032 | 0.490 | C>T | 0.086 | 0.682 | 0.187 | 0.532 |
| <i>SHANK3</i> | rs1024374   | 22 | 50710892 | 0.072 | 0.566 | G>C | 0.637 | 0.897 | 0.222 | 0.532 |
| <i>SHANK3</i> | rs73174419  | 22 | 50713256 | 0.052 | 0.248 | G>A | 0.956 | 0.932 | 0.480 | 0.578 |
| <i>SHANK3</i> | rs9616948   | 22 | 50714126 | 0.220 | 0.428 | A>G | 0.639 | 0.897 | 0.662 | 0.616 |
| <i>SHANK3</i> | rs6009953   | 22 | 50716723 | 0.414 | 0.689 | C>T | 0.427 | 0.897 | 0.668 | 0.616 |
| <i>SHANK3</i> | rs12628091  | 22 | 50717305 | 0.111 | 0.553 | T>C | 0.422 | 0.897 | 0.327 | 0.544 |
| <i>SHANK3</i> | rs76239491  | 22 | 50717681 | 0.163 | 0.886 | G>A | 0.075 | 0.682 | 0.614 | 0.592 |
| <i>SHANK3</i> | rs6010062   | 22 | 50718304 | 0.455 | 0.238 | A>G | 0.835 | 0.897 | 0.238 | 0.532 |
| <i>SHANK3</i> | rs73174424  | 22 | 50719055 | 0.043 | 1.000 | C>T | 0.253 | 0.888 | 0.552 | 0.587 |
| <i>SHANK3</i> | rs6010065   | 22 | 50719589 | 0.452 | 0.159 | C>G | 0.979 | 0.934 | 0.252 | 0.532 |
| <i>SHANK3</i> | rs12158487  | 22 | 50722853 | 0.112 | 0.555 | C>A | 0.490 | 0.897 | 0.306 | 0.543 |
| <i>SHANK3</i> | rs10451     | 22 | 50723631 | 0.430 | 0.937 | G>A | 0.569 | 0.897 | 0.425 | 0.561 |
| <i>SHANK3</i> | rs715586    | 22 | 50724710 | 0.113 | 0.439 | C>T | 0.550 | 0.897 | 0.290 | 0.532 |
| <i>SHANK3</i> | rs192700691 | 22 | 50725482 | 0.054 | 0.250 | C>T | 0.551 | 0.897 | 0.199 | 0.532 |
| <i>SHANK3</i> | rs6009957   | 22 | 50725859 | 0.438 | 1.000 | T>C | 0.621 | 0.897 | 0.516 | 0.587 |
| <i>SHANK3</i> | rs8137951   | 22 | 50727236 | 0.415 | 0.749 | G>A | 0.357 | 0.892 | 0.531 | 0.587 |
| <i>SHANK3</i> | rs2301584   | 22 | 50733069 | 0.154 | 0.368 | G>A | 0.345 | 0.892 | 0.509 | 0.587 |

|                |             |    |           |       |       |     |       |       |       |       |
|----------------|-------------|----|-----------|-------|-------|-----|-------|-------|-------|-------|
| <i>SHANK3</i>  | rs41281537  | 22 | 50733239  | 0.159 | 0.663 | G>A | 0.092 | 0.691 | 0.876 | 0.684 |
| <i>SHANK3</i>  | rs756638    | 22 | 50733265  | 0.225 | 0.312 | G>A | 0.024 | 0.456 | 0.323 | 0.544 |
| <i>SHANK3</i>  | rs5770825   | 22 | 50735903  | 0.135 | 0.505 | G>C | 0.139 | 0.695 | 0.236 | 0.532 |
| <i>SHANK3</i>  | rs3810648   | 22 | 50737198  | 0.053 | 0.248 | A>G | 0.470 | 0.897 | 0.210 | 0.532 |
| <i>SHANK3</i>  | rs77216309  | 22 | 50738594  | 0.036 | 1.000 | C>T | 0.955 | 0.932 | 0.890 | 0.684 |
| <i>SHARPIN</i> | rs2070688   | 8  | 144097007 | 0.258 | 0.032 | T>C | 0.281 | 0.888 | 0.293 | 0.532 |
| <i>SHARPIN</i> | rs77359862  | 8  | 144099379 | 0.039 | 0.267 | G>A | 0.949 | 0.932 | 0.388 | 0.544 |
| <i>SHARPIN</i> | rs117299156 | 8  | 144100763 | 0.041 | 0.296 | T>C | 0.627 | 0.897 | 0.704 | 0.616 |

Abbreviations: SNP, single nucleotide polymorphism; RCC, renal cell carcinoma; MAF, minor alleles frequency; HWE, Hardy-Weinberg equilibrium.
